# Supplementary material for: Association between varying cut-points of intermediate hyperglycemia and risk of mortality, cardiovascular events and chronic kidney disease: a systematic review and meta-analysis
Source: HighWire-hosted journal article supplement (doi:10.1136/bmjdrc-2020-001776), 2021-04-01
Supplement: bmjdrc-2020-001776supp008_data_supplement.pdf [file bmjdrc-2020-001776supp008_data_supplement.pdf]

Supplemental Table 4. The association between intermediate hyperglycemia and all-cause mortality, cardiovascular disease mortality, cardiovascular disease, stroke, heart disease, heart failure, and chronic kidney disease by region and presence of a pre-existing condition

|                                              | IFG-ADA        |                     |             | IFG-WHO        |                     |             | IGT            |                      |             | HbA1c-ADA      |                       |                 | HbA1c-IEC      |                     |                 |
|----------------------------------------------|----------------|---------------------|-------------|----------------|---------------------|-------------|----------------|----------------------|-------------|----------------|-----------------------|-----------------|----------------|---------------------|-----------------|
|                                              | No. of Studies | HR [95% CI]         | P value     | No. of Studies | HR [95% CI]         | P value     | No. of Studies | HR [95% CI]          | P value     | No. of Studies | HR [95% CI]           | P value         | No. of Studies | HR [95% CI]         | P value         |
| <b>Mortality</b>                             |                |                     |             |                |                     |             |                |                      |             |                |                       |                 |                |                     |                 |
| Region                                       |                |                     |             |                |                     |             |                |                      |             |                |                       |                 |                |                     |                 |
| Europe                                       | 6              | 1.23<br>[1.04-1.44] | 0.49        | 9              | 1.16<br>[1.13-1.19] | 0.66        | 12             | 1.16<br>[1.13-1.19]  | <b>0.05</b> | 5              | 0.98<br>[0.90-1.06]   | 0.22            | 1              | 1.21<br>[0.94-1.55] | <b>0.02</b>     |
| USA/<br>Canada                               | 8              | 1.08<br>[1.02-1.16] |             | 6              | 1.16<br>[1.05-1.28] |             | 5              | 1.14<br>[1.04-1.24]  |             | 5              | 1.20<br>[0.96-1.49]   |                 | 1              | 1.56<br>[1.40-1.73] |                 |
| Asia                                         | 7              | 1.21<br>[1.01-1.45] |             | 4              | 1.12<br>[1.01-1.24] |             | 7              | 1.36<br>[1.17-1.57]  |             | 4              | 0.99<br>[0.92-1.07]   |                 | 1              | 1.08<br>[0.81-1.44] |                 |
| Australia                                    | 2              | 1.02<br>[0.78-1.36] |             | 1              | 1.60<br>[1.03-2.48] |             | 1              | 1.50<br>[1.11-2.02]  |             | -              | -                     |                 | -              | -                   |                 |
| Middle East                                  | 3              | 1.06<br>[0.92-1.23] |             | 3              | 1.04<br>[0.67-1.61] |             | 3              | 1.30<br>[1.10-1.54]  |             | -              | -                     |                 | -              | -                   |                 |
| Africa                                       | -              | -                   |             | 2              | 1.05<br>[0.81-1.37] |             | 2              | 1.30<br>[1.11-1.53]  |             | -              | -                     |                 | -              | -                   |                 |
| South<br>America                             | -              | -                   |             | -              | -                   |             | -              | -                    |             | -              | -                     |                 | -              | -                   |                 |
| <b>Pre-existing Cardiovascular Condition</b> |                |                     |             |                |                     |             |                |                      |             |                |                       |                 |                |                     |                 |
| No                                           | 21             | 1.07<br>[1.01-1.14] | <b>0.03</b> | 24             | 1.16<br>[1.13-1.19] | <b>0.01</b> | 28             | 1.19<br>[1.14-1.23]  | 0.30        | 11             | 1.06<br>[0.95-1.19]   | 0.91            | 3              | 1.30<br>[1.03-1.66] | NA              |
| Yes                                          | 5              | 1.45<br>[1.11-1.88] |             | 1              | 1.39<br>[1.21-1.59] |             | 2              | 1.70<br>[0.86-3.37]  |             | 3              | 1.0741<br>[0.95-1.22] |                 | 0              | NA                  |                 |
| <b>CVD Mortality</b>                         |                |                     |             |                |                     |             |                |                      |             |                |                       |                 |                |                     |                 |
| Region                                       |                |                     |             |                |                     |             |                |                      |             |                |                       |                 |                |                     |                 |
| Europe                                       | 6              | 1.29<br>[1.10-1.52] | <b>0.01</b> | 8              | 1.19<br>[1.03-1.37] | 0.45        | 12             | 1.25<br>[1.08-1.45]  | 0.53        | 3              | 1.05<br>[0.87-1.27]   | <b>&lt;0.01</b> | -              | -                   | NA              |
| USA/<br>Canada                               | 8              | 0.99<br>[0.89-1.11] |             | 5              | 1.20<br>[1.00-1.43] |             | 4              | 1.10<br>[0.89-1.36]  |             | 2              | 2.03<br>[1.41-2.92]   |                 | 1              | 1.07<br>[0.61-1.87] |                 |
| Asia                                         | 9              | 1.24<br>[1.03-1.50] |             | 3              | 1.24<br>[1.01-1.53] |             | 4              | 1.26<br>[1.05-1.50]  |             | 2              | 0.88<br>[0.63-1.23]   |                 | -              | -                   |                 |
| Australia                                    |                |                     |             | 1              | 2.50<br>[1.21-5.15] |             | 1              | 1.20<br>[0.68-2.13]  |             | -              | -                     |                 | -              | -                   |                 |
| Middle East                                  | 1              | 0.62<br>[0.28-1.36] |             | 1              | 1.29<br>[1.01-1.64] |             | 1              | 0.62<br>[0.28-1.36]  |             | -              | -                     |                 | -              | -                   |                 |
| Africa                                       | -              | -                   |             | 2              | 0.98<br>[0.54-1.78] |             | 2              | 1.27<br>[1.02-1.58]  |             | -              | -                     |                 | -              | -                   |                 |
| South<br>America                             | -              | -                   |             | -              | -                   |             | -              | -                    |             | -              | -                     |                 | -              | -                   |                 |
| <b>Pre-existing Cardiovascular Condition</b> |                |                     |             |                |                     |             |                |                      |             |                |                       |                 |                |                     |                 |
| No                                           | 18             | 1.06<br>[0.97-1.16] | <b>0.04</b> | 19             | 1.20<br>[1.08-1.33] | 0.58        | 22             | 1.183<br>[1.09-1.29] | 0.05        | 6              | 1.23<br>[0.89-1.71]   | 0.42            | 1              | 1.07<br>[0.61-1.87] | NA              |
| Yes                                          | 6              | 1.40<br>[1.09-1.80] |             | 1              | 1.29<br>[1.01-1.64] |             | 2              | 2.20<br>[1.18-4.12]  |             | 1              | 0.95<br>[0.55-1.65]   |                 | -              | -                   |                 |
| <b>CVD Events</b>                            |                |                     |             |                |                     |             |                |                      |             |                |                       |                 |                |                     |                 |
| Region                                       |                |                     |             |                |                     |             |                |                      |             |                |                       |                 |                |                     |                 |
| Europe                                       | 7              | 1.22<br>[0.96-1.56] | 0.28        | 3              | 1.11<br>[0.93-1.34] | 0.21        | 8              | 1.23<br>[1.06-1.43]  | 0.53        | 9              | 1.12<br>[1.03-1.23]   | 0.20            | 4              | 1.16<br>[1.01-1.34] | <b>&lt;0.01</b> |
| USA/<br>Canada                               | 9              | 1.16<br>[1.01-1.33] |             | 2              | 1.21<br>[1.07-1.37] |             | 3              | 1.14<br>[1.02-1.28]  |             | 4              | 1.38<br>[1.07-1.79]   |                 | 1              | 1.91<br>[1.65-2.21] |                 |
| Asia                                         | 7              | 1.07                |             | 3              | 1.60                |             | 6              | 1.17                 |             | 3              | 1.04                  |                 |                |                     |                 |

|                                              |    |              |      |             |                  |              |    |                  |      |    |              |             |   |             |    |
|----------------------------------------------|----|--------------|------|-------------|------------------|--------------|----|------------------|------|----|--------------|-------------|---|-------------|----|
| Australia                                    | -  | [0.94-1.22]  | -    | [1.12-2.27] | -                | [1.07- 1.27] | -  | [0.89- 1.21]     | -    | -  | -            | -           | - | -           | -  |
| Middle East                                  | 2  | 1.46         | -    | -           | 2                | 1.46         | -  | -                | -    | -  | -            | -           | - | -           | -  |
| Africa                                       | 1  | 1.77         | -    | -           | -                | -            | -  | -                | -    | -  | -            | -           | - | -           | -  |
| South America                                | -  | [0.92-3.40]  | -    | -           | -                | -            | -  | -                | -    | -  | -            | -           | - | -           | -  |
| <b>Pre-existing Cardiovascular Condition</b> |    |              |      |             |                  |              |    |                  |      |    |              |             |   |             |    |
| No                                           | 18 | 1.14         | 0.63 | 7           | 1.20             | 0.25         | 15 | 1.17             | 0.21 | 12 | 1.14         | 0.77        | 5 | 1.32        | NA |
|                                              |    | [1.04-1.26]  |      |             | [1.08-1.32]      |              |    | [1.09-1.24]      |      |    | [1.00-1.31]  |             |   | [1.00-1.73] |    |
| Yes                                          | 8  | 1.22         | -    | 1           | 1.86             | -            | 4  | 1.33             | -    | 4  | 1.18         | -           | - | -           | -  |
|                                              |    | [0.96-1.54]  |      |             | [0.88-3.95]      |              |    | [1.10-1.62]      |      |    | [0.96-1.45]  |             |   |             |    |
| <b>Stroke Events</b>                         |    |              |      |             |                  |              |    |                  |      |    |              |             |   |             |    |
| Region                                       |    |              |      |             |                  |              |    |                  |      |    |              |             |   |             |    |
| Europe                                       | 3  | 1.29         | 0.22 | 4           | 1.21             | 0.93         | 5  | 1.29             | 0.71 | 2  | 1.22         | 0.18        | 2 | 1.28        | NA |
|                                              |    | [0.99-1.69]  |      |             | [1.05-1.40]      |              |    | [1.07-1.56]      |      |    | [0.72-2.08]  |             |   | [0.72-2.27] |    |
| USA/Canada                                   | 7  | 0.94         | -    | 1           | 1.13             | -            | 1  | 1.17             | -    | 3  | 1.39         | -           | - | -           | -  |
|                                              |    | [0.80-1.11]  |      |             | [0.86-1.49]      |              |    | [0.76- 1.81]     |      |    | [1.15-1.66]  |             |   |             |    |
| Asia                                         | 4  | 1.10         | -    | 2           | 0.99             | -            | 4  | 1.26             | -    | 1  | 1.22         | -           | - | -           | -  |
|                                              |    | [0.90-1.36]  |      |             | [0.22-4.34]      |              |    | [0.80-1.98]      |      |    | [0.72; 2.08] |             |   |             |    |
| Australia                                    |    |              |      |             |                  |              |    |                  |      |    |              |             |   |             |    |
| Middle East                                  | 3  | 1.29         | -    | 2           | 1.47             | -            | 3  | 0.91             | -    | -  | -            | -           | - | -           | -  |
|                                              |    | [0.86-1.93]  |      |             | [0.59-3.63]      |              |    | [0.51-1.62]      |      |    |              |             |   |             |    |
| Africa                                       | 1  | 1.49         | -    | -           | -                | -            | -  | -                | -    | -  | -            | -           | - | -           | -  |
|                                              |    | [0.59-3.75]  |      |             |                  |              |    |                  |      |    |              |             |   |             |    |
| South America                                | -  | -            | -    | -           | -                | -            | -  | -                | -    | -  | -            | -           | - | -           | -  |
| <b>Pre-existing Cardiovascular Condition</b> |    |              |      |             |                  |              |    |                  |      |    |              |             |   |             |    |
| No                                           | 15 | 1.06         | 0.87 | 9           | 1.22             | NA           | 13 | 1.24             | NA   | 6  | 1.23         | NA          | 2 | 1.28        | NA |
|                                              |    | [0.95-1.19]  |      |             | [1.07- 1.40]     |              |    | [1.06-1.45]      |      |    | [1.04-1.46]  |             |   | [0.72-2.27] |    |
| Yes                                          | 3  | 1.03         | -    | -           | -                | -            | -  | 1                | -    | -  | -            | -           | - | -           | -  |
|                                              |    | [0.71- 1.49] |      |             |                  |              |    |                  |      |    |              |             |   |             |    |
| <b>Heart Disease Events</b>                  |    |              |      |             |                  |              |    |                  |      |    |              |             |   |             |    |
| Region                                       |    |              |      |             |                  |              |    |                  |      |    |              |             |   |             |    |
| Europe                                       | 1  | 1.12         | 0.86 | 6           | 1.19             | 0.16         | 5  | 1.12             | 0.18 | 2  | 1.12         | <b>0.05</b> | 2 | 1.33        | NA |
|                                              |    | [0.80-1.57]  |      |             | [1.03-1.21]      |              |    | [1.03-1.22]      |      |    | [0.95-1.33]  |             |   | [0.74-2.38] |    |
| USA/Canada                                   | 6  | 1.10         | -    | 1           | 1.45             | -            | 2  | 0.96             | -    | 3  | 1.47         | -           | - | -           | -  |
|                                              |    | [0.99-1.21]  |      |             | [1.15-1.83]      |              |    | [0.79-1.17]      |      |    | [1.27-1.70]  |             |   |             |    |
| Asia                                         | 7  | 1.19         | -    | 3           | 0.97             | -            | 6  | 1.32             | -    | 1  | 1.24         | -           | - | -           | -  |
|                                              |    | [1.00-1.41]  |      |             | [0.62-1.52]      |              |    | [1.07-1.63]      |      |    | [0.97-1.60]  |             |   |             |    |
| Australia                                    | -  | -            | -    | -           | -                | -            | -  | -                | -    | -  | -            | -           | - | -           | -  |
| Middle East                                  | 3  | 1.02         | -    | 3           | 1.0500           | -            | 3  | 1.2346           | -    | -  | -            | -           | - | -           | -  |
|                                              |    | [0.72-1.46]  |      |             | [0.8048; 1.3699] |              |    | [0.8307; 1.8349] |      |    |              |             |   |             |    |
| Africa                                       | 1  | 0.96         | -    | -           | -                | -            | -  | -                | -    | -  | -            | -           | - | -           | -  |
|                                              |    | [0.62-1.48]  |      |             |                  |              |    |                  |      |    |              |             |   |             |    |
| South America                                | -  | -            | -    | -           | -                | -            | -  | -                | -    | -  | -            | -           | - | -           | -  |
| <b>Pre-existing Cardiovascular Condition</b> |    |              |      |             |                  |              |    |                  |      |    |              |             |   |             |    |
| No                                           | 16 | 1.11         | 0.94 | 13          | 1.14             | NA           | 15 | 1.13             | 0.85 | 6  | 1.28         | NA          | 2 | 1.33        | NA |
|                                              |    | [1.01-1.21]  |      |             | [1.06-1.22]      |              |    | [1.06-1.21]      |      |    | [1.13-1.46]  |             |   | [0.74-2.38] |    |
| Yes                                          | 2  | 1.10         | -    | -           | -                | -            | 1  | 1.19             | -    | -  | -            | -           | - | -           | -  |
|                                              |    | [0.92-1.30]  |      |             |                  |              |    | [0.69- 2.06]     |      |    |              |             |   |             |    |
| <b>Heart Failure Events</b>                  |    |              |      |             |                  |              |    |                  |      |    |              |             |   |             |    |

|                                               |   |                     |      |   |                     |             |   |                      |      |   |                     |      |   |                     |    |
|-----------------------------------------------|---|---------------------|------|---|---------------------|-------------|---|----------------------|------|---|---------------------|------|---|---------------------|----|
| Region                                        |   |                     |      |   |                     |             |   |                      |      |   |                     |      |   |                     |    |
| Europe                                        | 1 | 1.13<br>[0.82-1.54] | 0.25 | - | -                   | NA          | - | -                    | NA   | - | -                   | NA   | - | -                   | NA |
| USA/                                          | 4 | 0.92<br>[0.81-1.05] |      | - | -                   |             | 1 | 5.04<br>[1.00-25.40] |      | 3 | 1.13<br>[0.87-1.45] |      | - | -                   |    |
| Canada                                        |   |                     |      |   |                     |             |   |                      |      |   |                     |      |   |                     |    |
| Asia                                          | - | -                   |      | - | -                   |             | - | -                    |      | - | -                   |      | - | -                   |    |
| Australia                                     | - | -                   |      | - | -                   |             | - | -                    |      | - | -                   |      | - | -                   |    |
| Middle East                                   | - | -                   |      | - | -                   |             | - | -                    |      | - | -                   |      | - | -                   |    |
| Africa                                        | - | -                   |      | - | -                   |             | - | -                    |      | - | -                   |      | - | -                   |    |
| South                                         | - | -                   |      | - | -                   |             | - | -                    |      | - | -                   |      | - | -                   |    |
| America                                       |   |                     |      |   |                     |             |   |                      |      |   |                     |      |   |                     |    |
| <b>Pre-existing Cardiovascular Conditions</b> |   |                     |      |   |                     |             |   |                      |      |   |                     |      |   |                     |    |
| No                                            | 4 | 0.92<br>[0.81-1.05] | 0.25 | - | -                   | NA          | 1 | 5.04<br>[1.00-25.40] | NA   | 3 | 1.13<br>[0.87-1.45] | NA   | - | -                   | NA |
| Yes                                           | 1 | 1.13<br>[0.82-1.55] |      | - | -                   |             | - | -                    |      | - | -                   |      | - | -                   |    |
| <b>CKD Events</b>                             |   |                     |      |   |                     |             |   |                      |      |   |                     |      |   |                     |    |
| Region                                        |   |                     | 0.82 |   |                     | <b>0.04</b> |   |                      | 0.26 |   |                     | 0.53 |   |                     | NA |
| Europe                                        | - | -                   |      | - | -                   |             | - | -                    |      | - | -                   |      | - | -                   |    |
| USA/                                          | 3 | 1.09<br>[1.00-1.19] |      | 1 | 1.28<br>[1.14-1.43] |             | 2 | 1.14<br>[1.02-1.28]  |      | 2 | 1.28<br>[1.02-1.60] |      | 1 | 1.50<br>[1.32-1.70] |    |
| Canada                                        |   |                     |      |   |                     |             |   |                      |      |   |                     |      |   |                     |    |
| Asia                                          | - | -                   |      | 3 | 1.07<br>[0.83-1.38] |             | 2 | 1.40<br>[0.93-2.11]  |      | 1 | 1.39<br>[1.21-1.60] |      | - | -                   |    |
| Australia                                     | - | -                   |      | - | -                   |             | - | -                    |      | - | -                   |      | - | -                   |    |
| Middle East                                   | 2 | 1.12<br>[0.89-1.41] |      | 2 | 0.91<br>[0.71-1.17] |             | 2 | 0.94<br>[0.71-1.25]  |      | - | -                   |      | - | -                   |    |
| Africa                                        | - | -                   |      | - | -                   |             | - | -                    |      | - | -                   |      | - | -                   |    |
| South                                         | - | -                   |      | - | -                   |             | - | -                    |      | - | -                   |      | - | -                   |    |
| America                                       |   |                     |      |   |                     |             |   |                      |      |   |                     |      |   |                     |    |
