# Supplementary figures and images for: Association between varying cut-points of intermediate hyperglycemia and risk of mortality, cardiovascular events and chronic kidney disease: a systematic review and meta-analysis
Source: HighWire-hosted journal article supplement (doi:10.1136/bmjdrc-2020-001776), 2021-04-01

**Supplemental Figure 12****Funnel Plot: Stroke Events**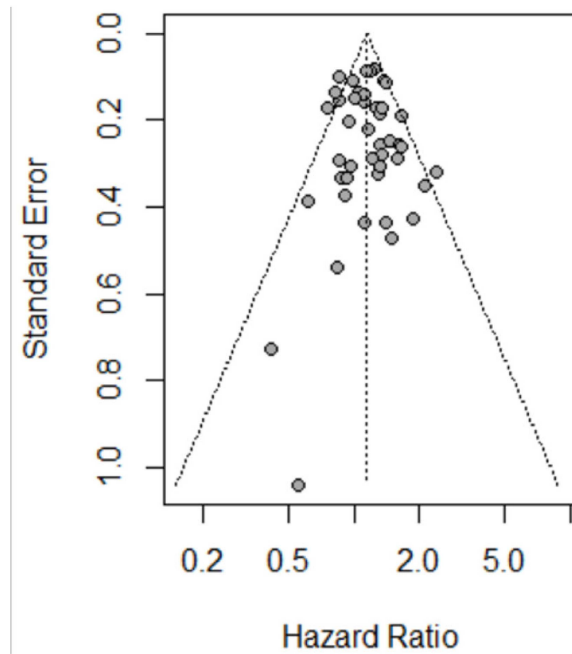

Supplement: bmjdrc-2020-001776supp013_data_supplement.pdf [file bmjdrc-2020-001776supp013_data_supplement.pdf]

Supplemental Figure 6. Heart Disease Events

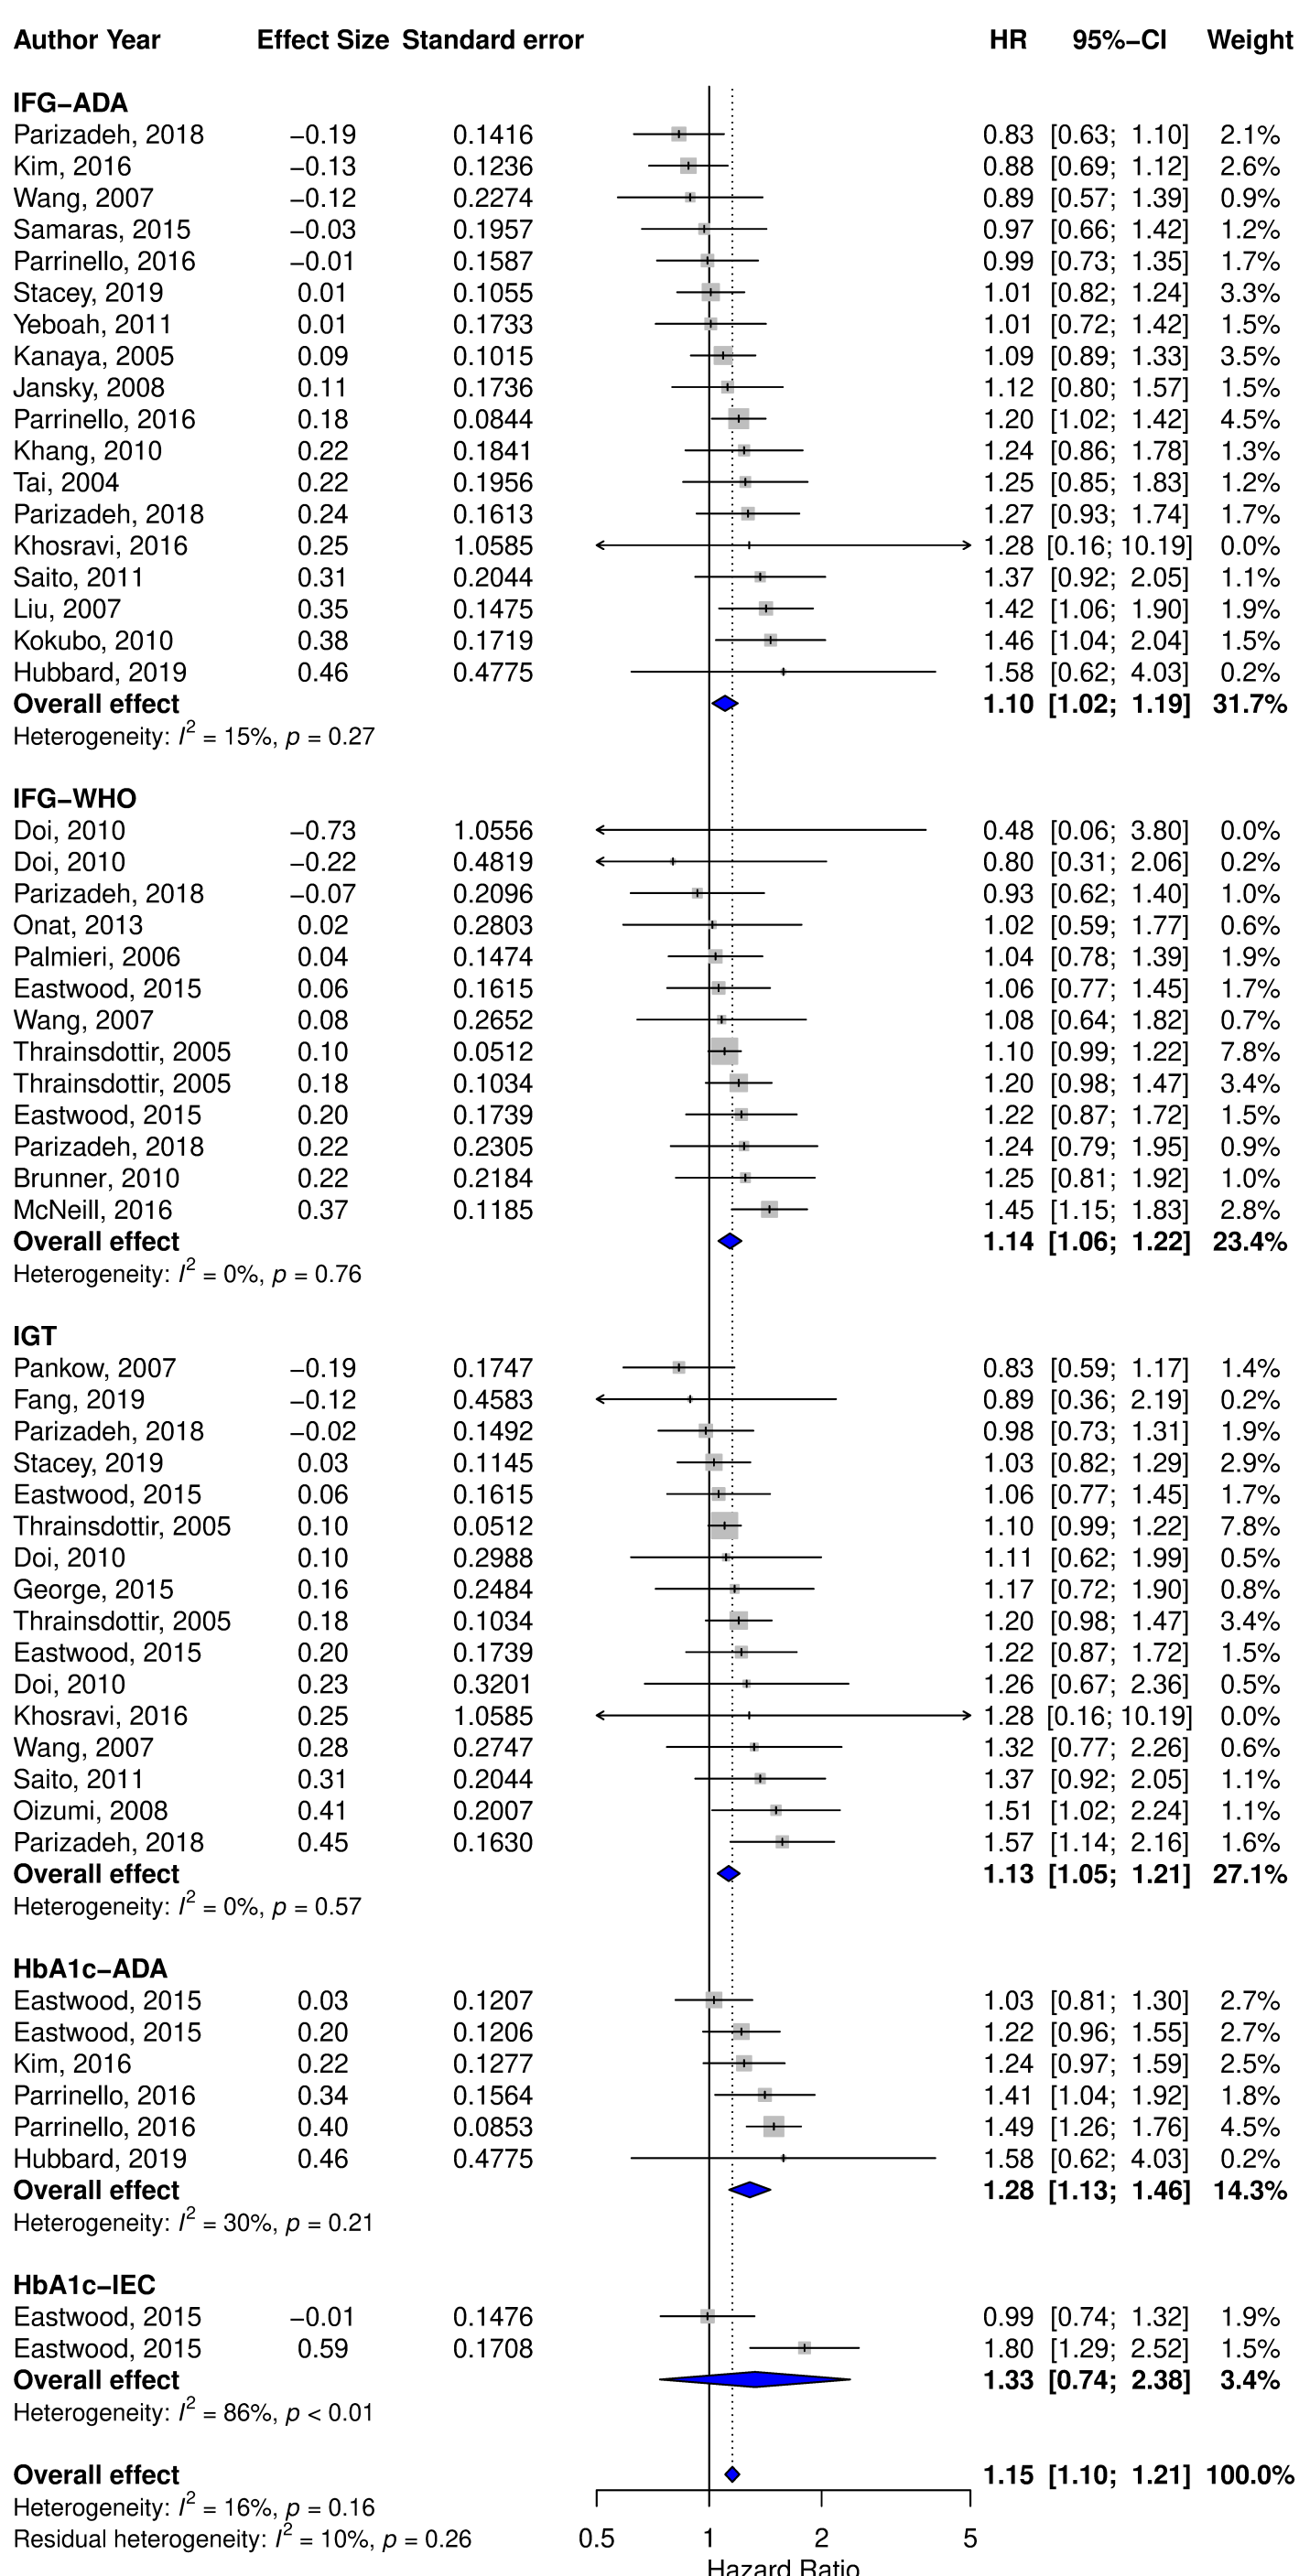

Supplement: bmjdrc-2020-001776supp014_data_supplement.pdf [file bmjdrc-2020-001776supp014_data_supplement.pdf]

**Supplemental Figure 13****Funnel Plot: Heart Disease Events**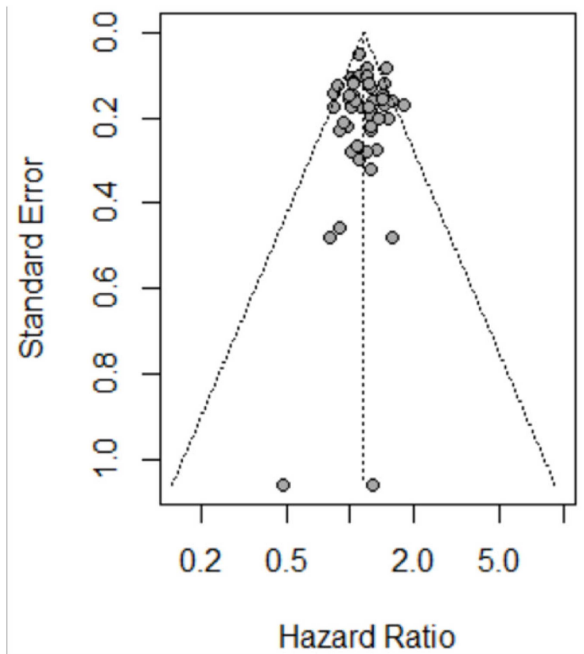

Supplement: bmjdrc-2020-001776supp015_data_supplement.pdf [file bmjdrc-2020-001776supp015_data_supplement.pdf]

## Supplemental Figure 7. Heart Failure Events

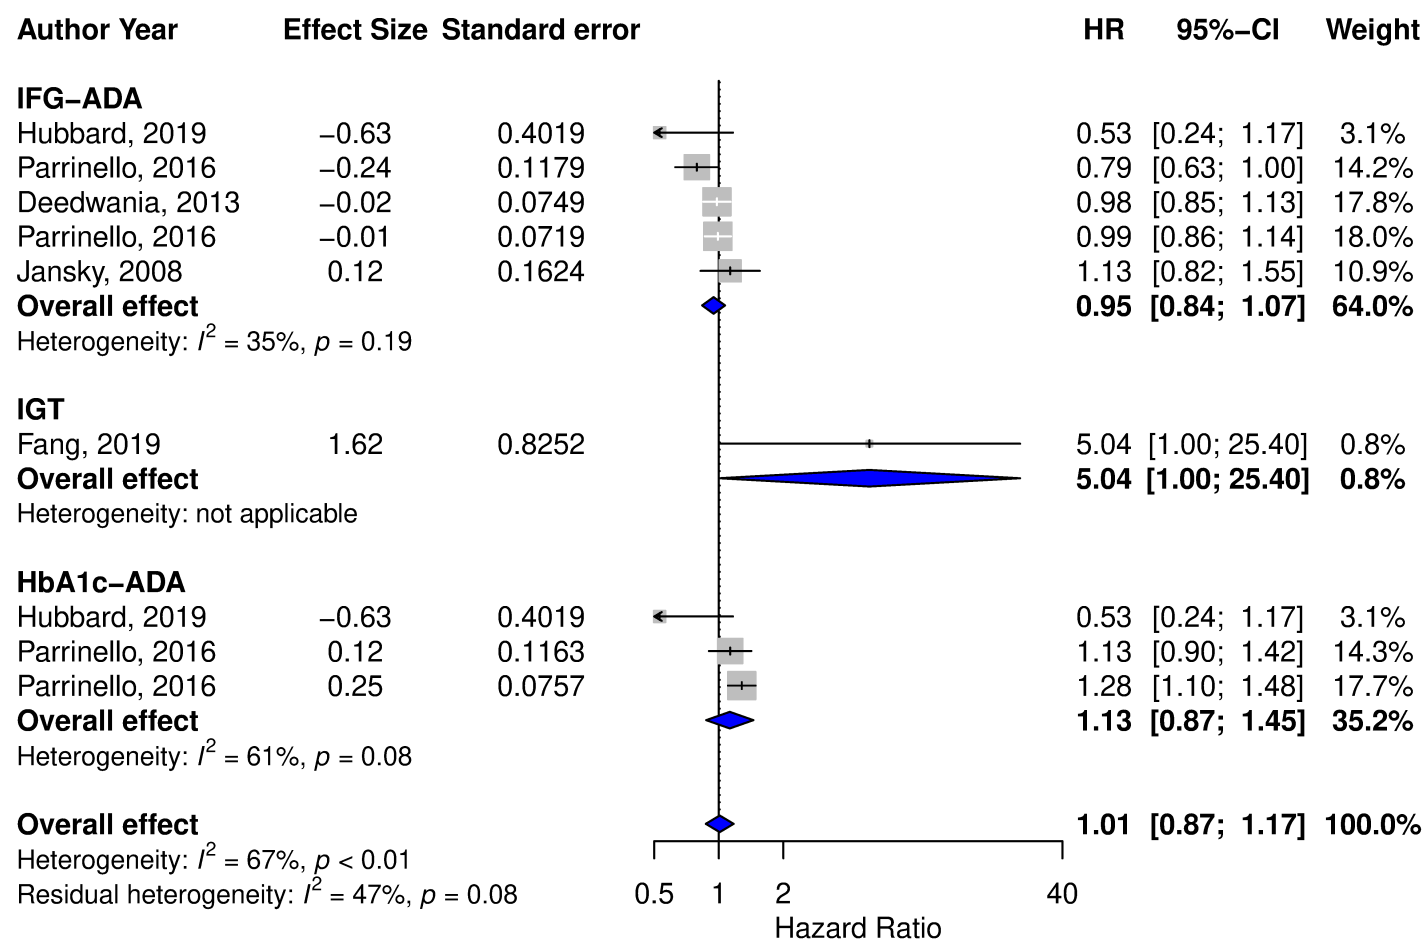

Supplement: bmjdrc-2020-001776supp016_data_supplement.pdf [file bmjdrc-2020-001776supp016_data_supplement.pdf]

Supplemental Figure 8. Chronic Kidney Disease

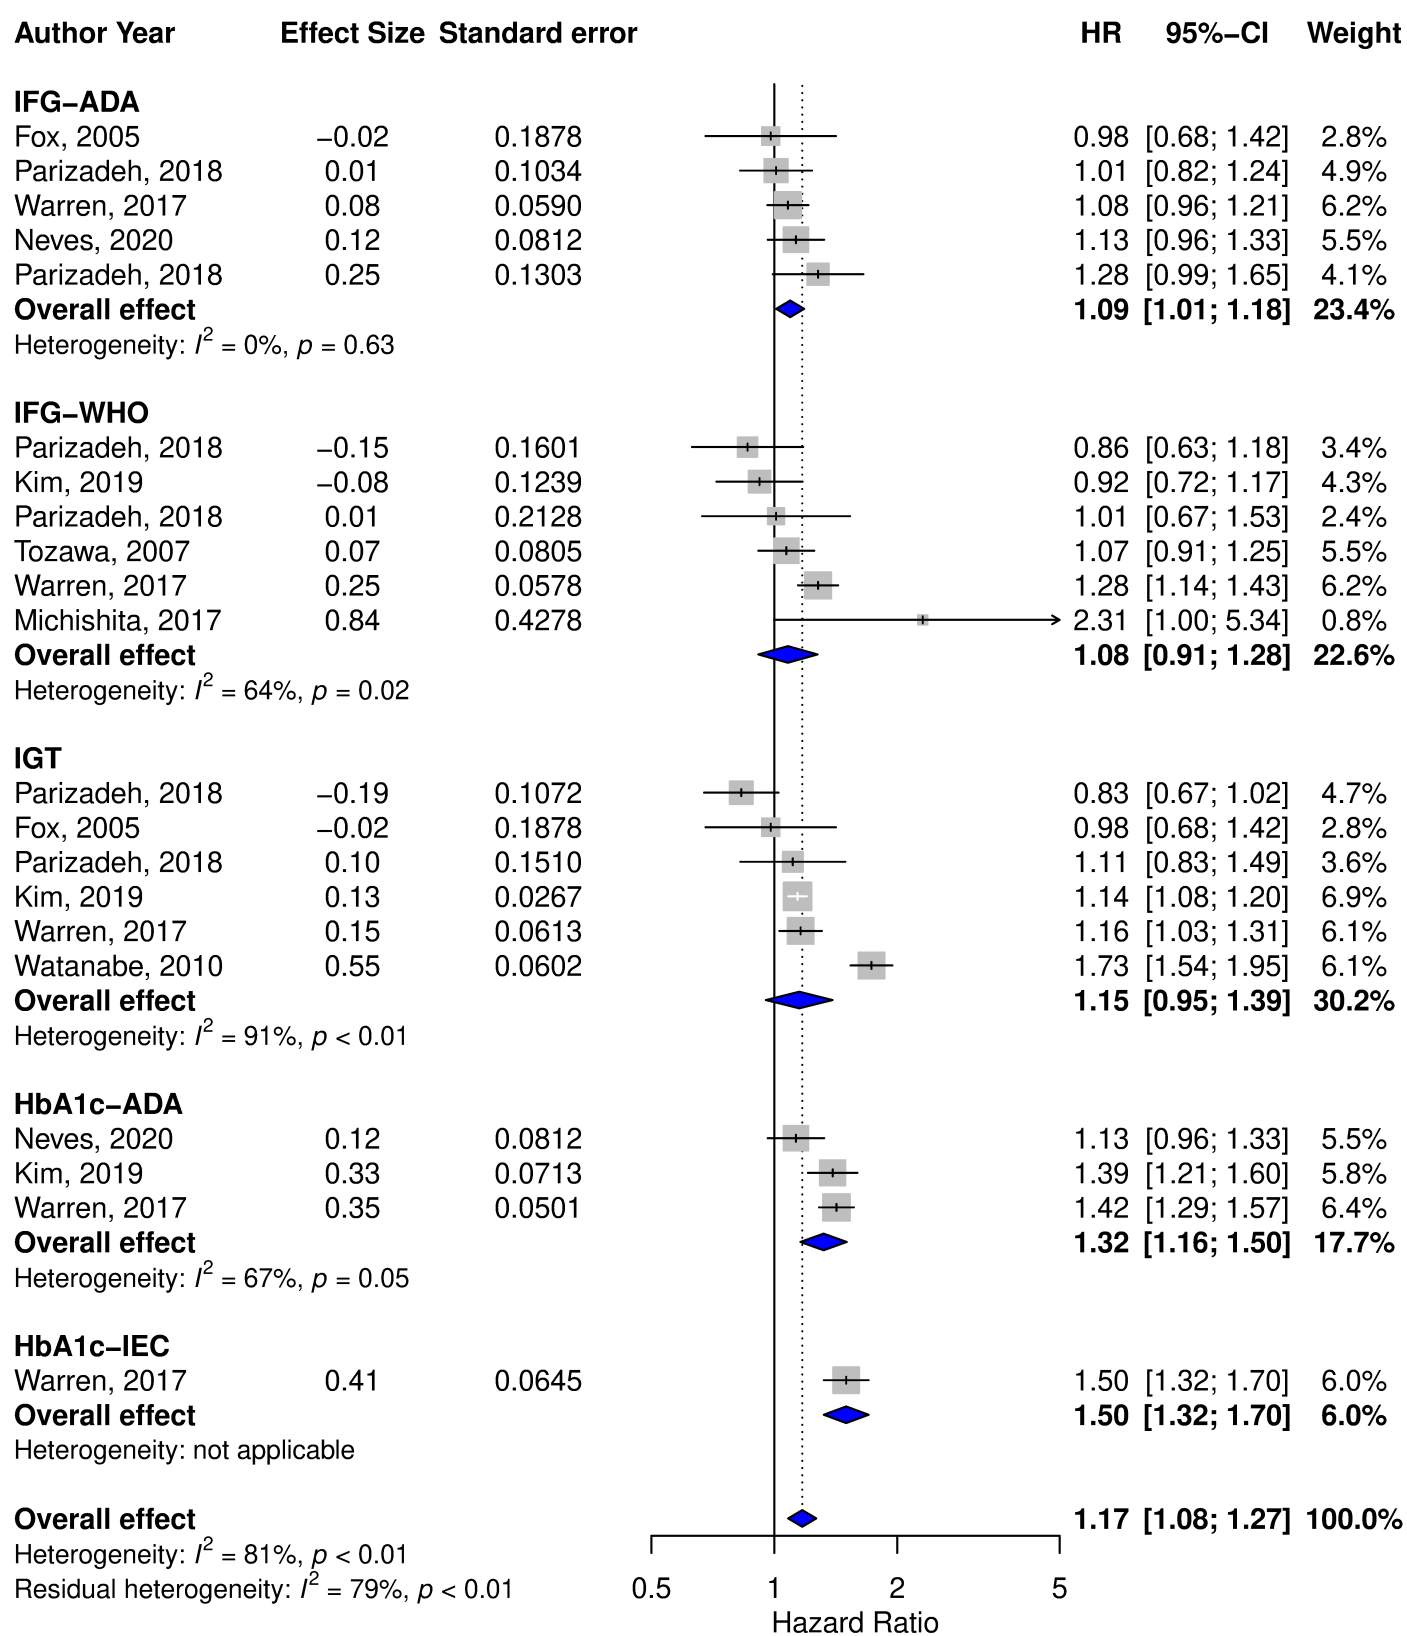

Supplement: bmjdrc-2020-001776supp018_data_supplement.pdf [file bmjdrc-2020-001776supp018_data_supplement.pdf]

**Supplemental Figure 15****Funnel Plot: Chronic Kidney Disease Events**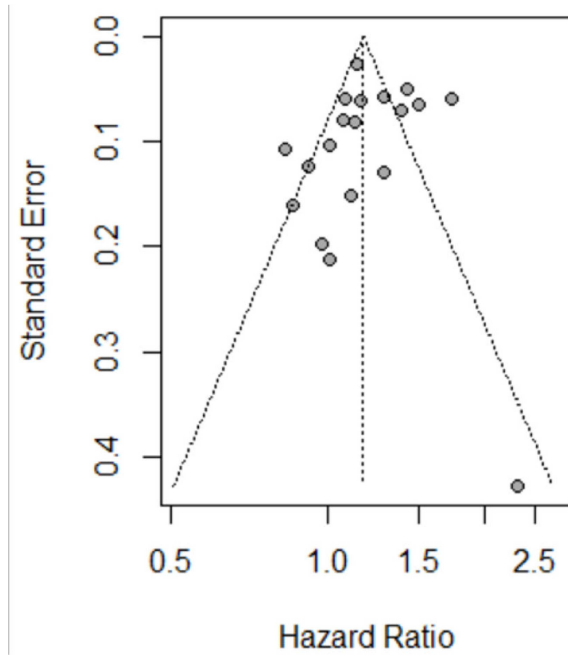

Supplement: bmjdrc-2020-001776supp019_data_supplement.pdf [file bmjdrc-2020-001776supp019_data_supplement.pdf]

**Supplemental Figure 2. All-Cause Mortality**

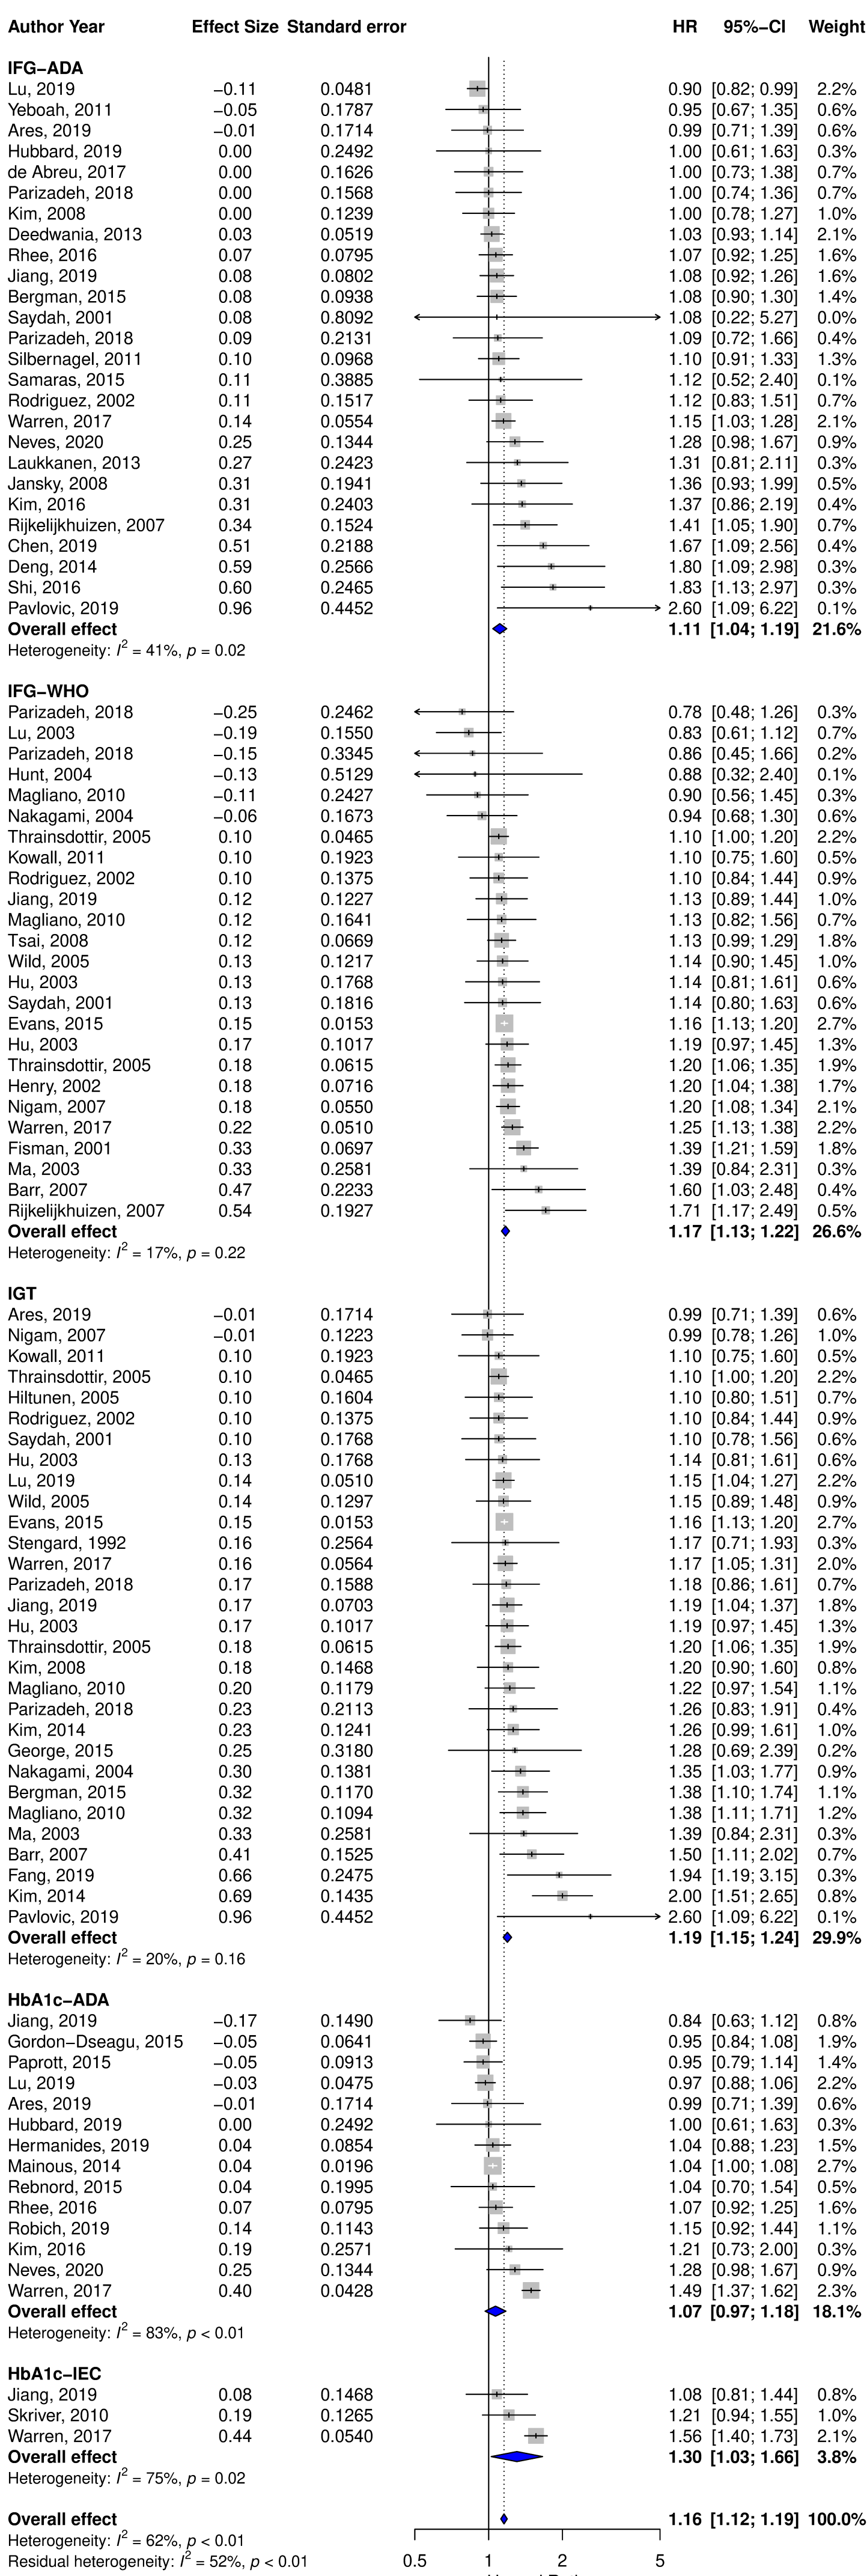

Supplement: bmjdrc-2020-001776supp005_data_supplement.pdf [file bmjdrc-2020-001776supp005_data_supplement.pdf]

**Supplemental Figure 9****Funnel Plot: All-cause Mortality**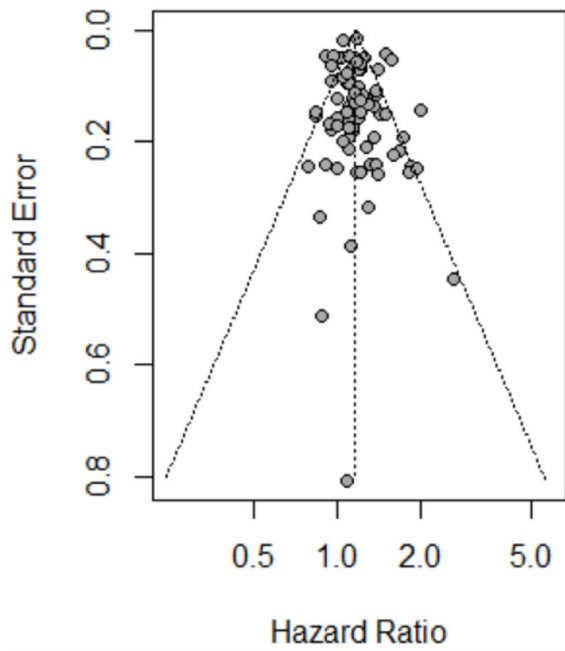

Supplement: bmjdrc-2020-001776supp006_data_supplement.pdf [file bmjdrc-2020-001776supp006_data_supplement.pdf]

Supplemental Figure 3. Cardiovascular Disease Mortality

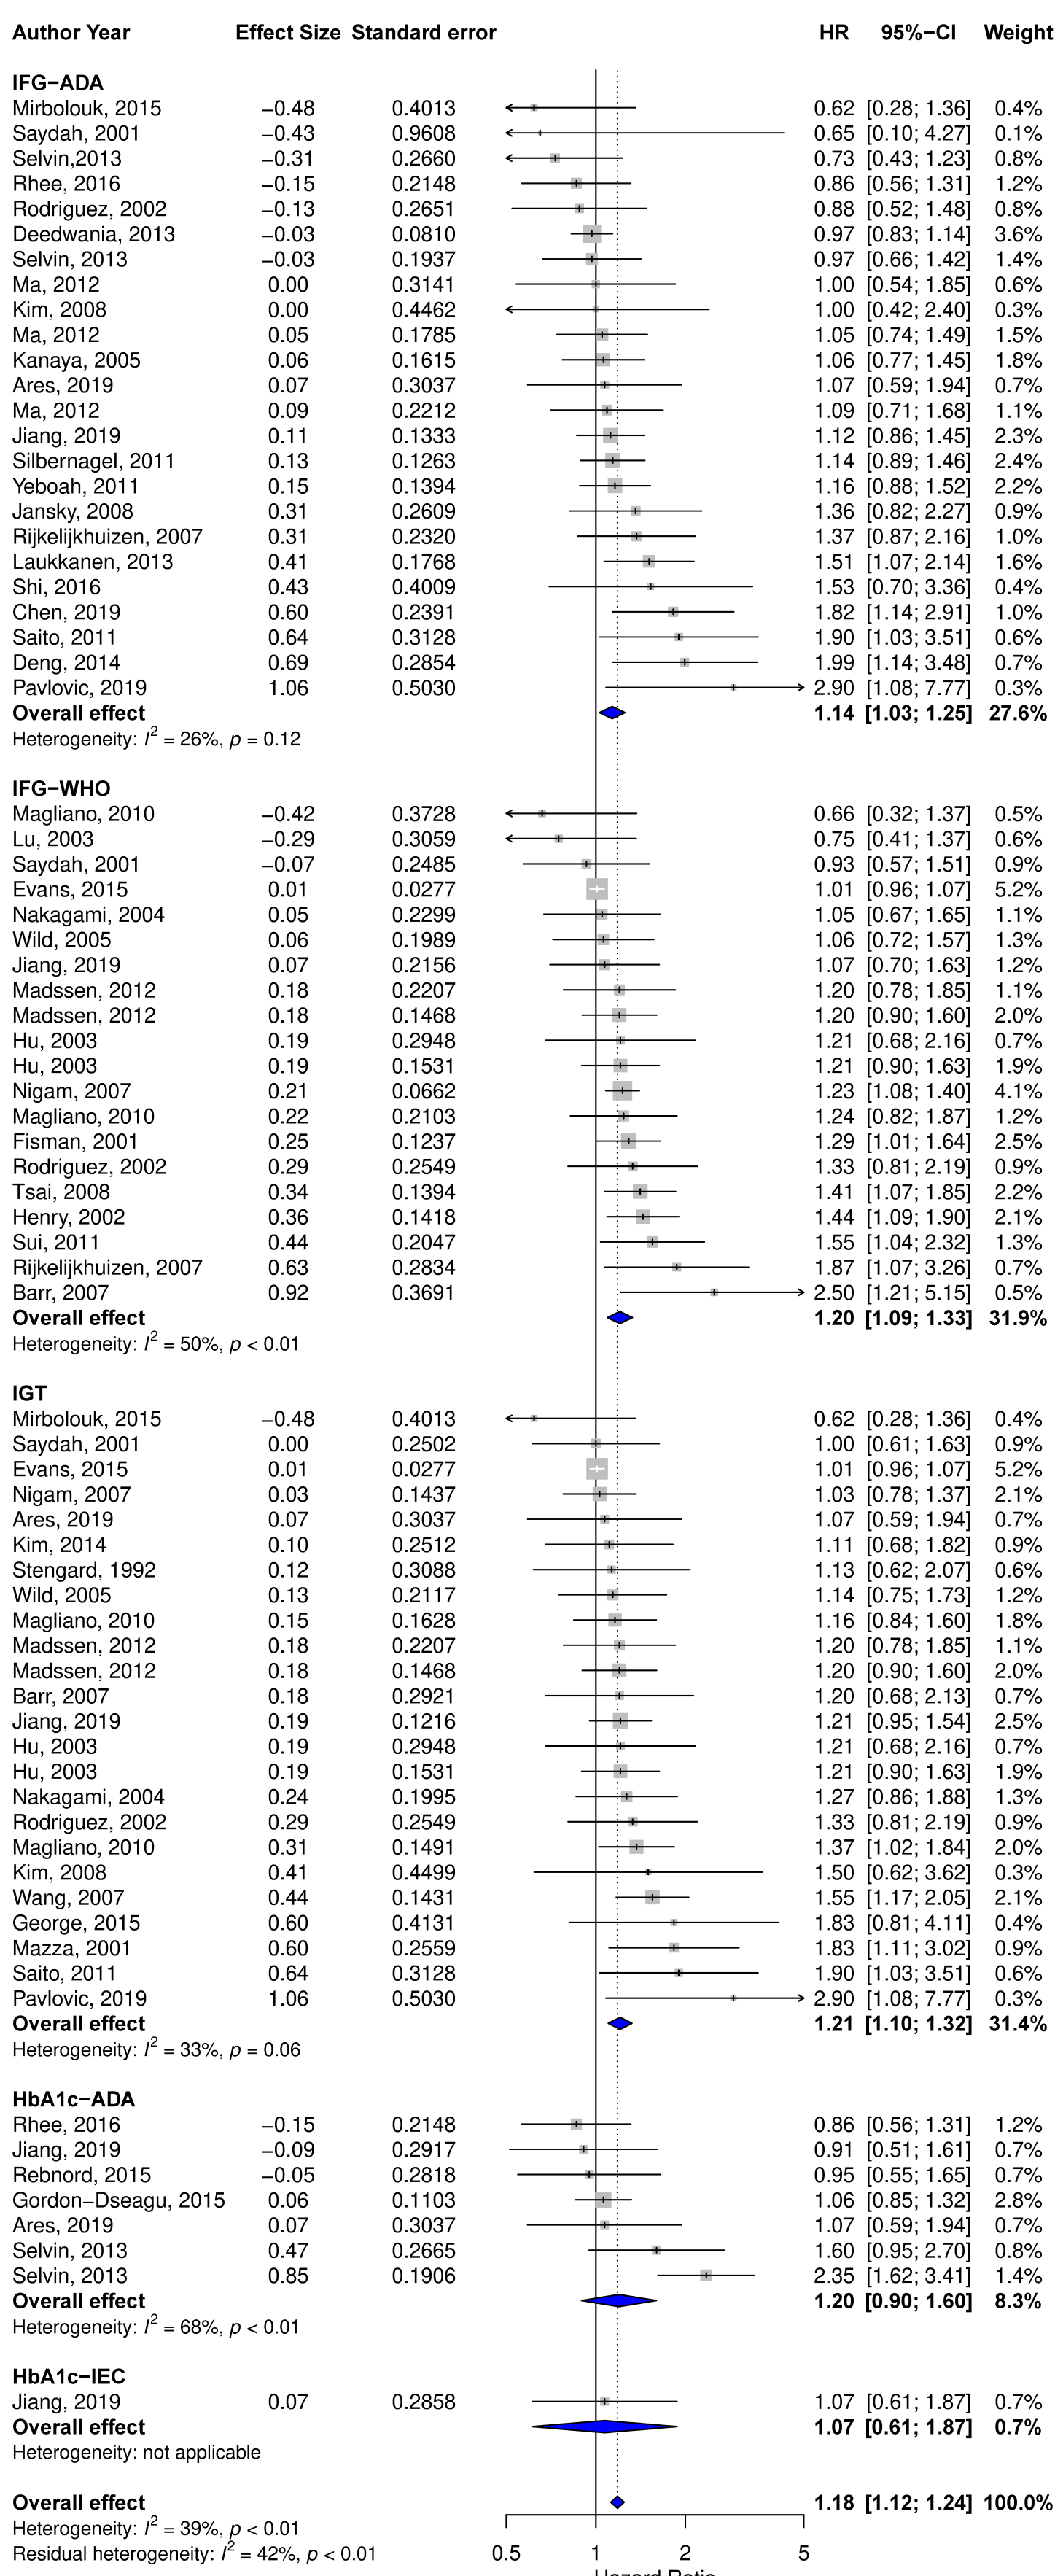

Supplement: bmjdrc-2020-001776supp007_data_supplement.pdf [file bmjdrc-2020-001776supp007_data_supplement.pdf]

**Supplemental Figure 10****Funnel Plot: Cardiovascular Mortality**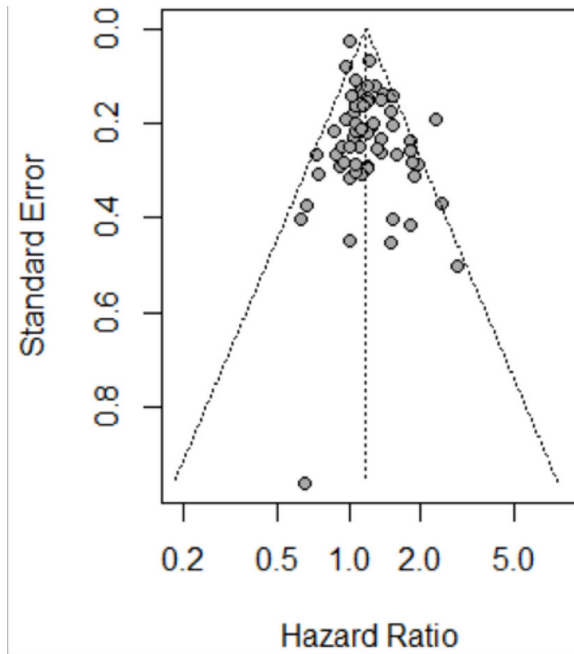

Supplement: bmjdrc-2020-001776supp009_data_supplement.pdf [file bmjdrc-2020-001776supp009_data_supplement.pdf]
